# Supplementary material
Source: Springer Nature journal article supplement (https://www.springermedizin.de/resource/supplementary/12936_2008_810_MOESM1_ESM.pdf/9548976)

JFM

AMJ

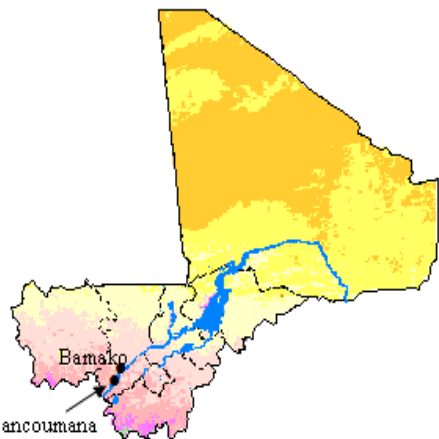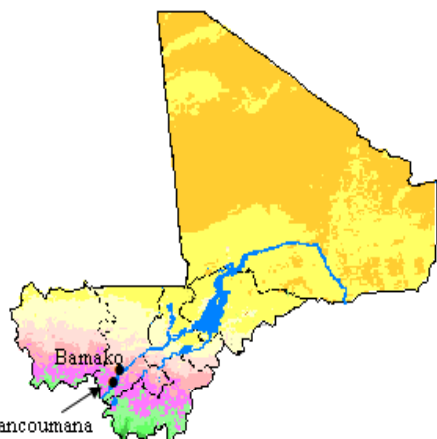

JAS

OND

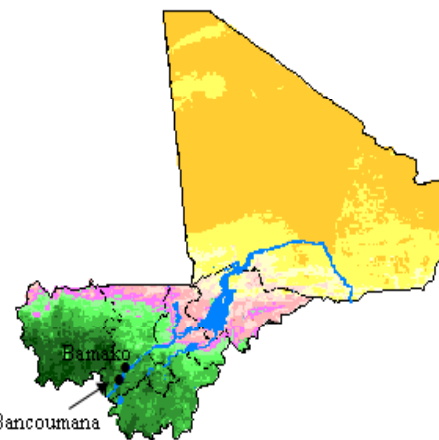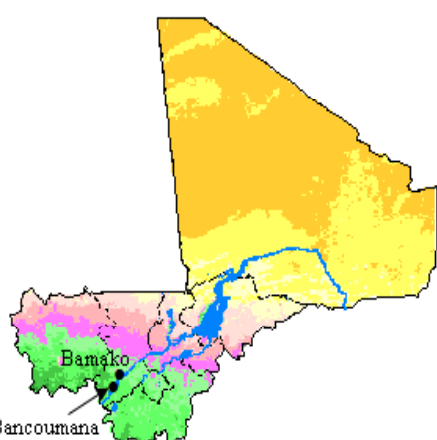

0 .10 .16 .22 .28 .34 .40 .46 .52 .58 .64 .70 1

NDVI Moyen

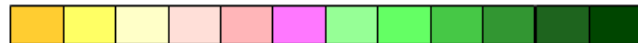

Supplement: MOESM1 [file 9548976]
